# Supplementary material for: Model of Early Diagenesis in the Upper Sediment with Adaptable complexity – MEDUSA (v. 2): a time-dependent biogeochemical sediment module for Earth System Models, process analysis and teaching
Source: Copernicus journal article supplement (doi:10.5194/gmd-2020-309), 2020-10-09
Supplement: Supplementary file 7 [file gmd-2020-309-supplement.zip]

Archive with 12 entries (12 files):
- readme.txt
- medusa_v2.tar.gz
- diagengen.pdf
- smcontents.pdf
- additionalresults.pdf
- jeasim_defs.pdf
- medusatechref.pdf
- buildandrun.pdf
- medusa-frameworksystem.pdf
- coupling-guidelines.pdf
- medusa-cocogen.pdf
- medmbm.pdf
