# Supplementary material for: Model of Early Diagenesis in the Upper Sediment with Adaptable complexity – MEDUSA (v. 2): a time-dependent biogeochemical sediment module for Earth System Models, process analysis and teaching
Source: Copernicus journal article supplement (doi:10.5194/gmd-2020-309), 2020-10-09
Supplement: Supplementary file 7 [file gmd-2020-309-supplement.zip › readme.txt]

This archive contains Supplementary Material to the paper
"G. Munhoven. Model of Early Diagenesis in the Upper Sediment with Adaptable
 complexity -- MEDUSA (v.2): a time-dependent biogeochemical sediment module
 for Earth System Models, process analysis and teaching, submitted for
 publication to Geosci. Model Dev., 2020."


Please refer to smcontents.pdf for more information about the contents.


Notice:

medusa_v2.tar.gz extracts its contents by default into the working directory.
